# Supplementary material for: Household food insecurity among patients with pulmonary tuberculosis and its associated factors in South India: a cross-sectional analysis
Source: PubMed Central journal article supplement — BMJ Open. 2020 Feb 28;10(2):e033798. doi: 10.1136/bmjopen-2019-033798 (PMC7050349; doi:10.1136/bmjopen-2019-033798), 2020-02-28
Supplement: bmjopen-2019-033798supp001.pdf [file bmjopen-2019-033798supp001.pdf]

## ANNEXURE 1

## Household Food Insecurity Access Scale (HFIAS) Measurement Tool

| Occurrence Questions                                                                                                                        | Occurrence <sup>1</sup> |        |           |       |
|---------------------------------------------------------------------------------------------------------------------------------------------|-------------------------|--------|-----------|-------|
|                                                                                                                                             | No                      | Rarely | Sometimes | Often |
| I. Worry or anxiety about food                                                                                                              |                         |        |           |       |
| 1. worry that the household would not have enough food                                                                                      |                         |        |           |       |
| II. Insufficient Quality of Food                                                                                                            |                         |        |           |       |
| 2. Any household member not able to eat the kinds of foods preferred because of lack of resources                                           |                         |        |           |       |
| 3. Eat a limited variety of foods due to a lack of resources                                                                                |                         |        |           |       |
| 4. Any household member have to eat some foods that really did not want to eat because of a lack of resources to obtain other types of food |                         |        |           |       |
| III. Insufficient Quantity of Food                                                                                                          |                         |        |           |       |
| 5. Any household member have to eat a smaller meal than needed because there was not enough food                                            |                         |        |           |       |
| 6. Eat fewer meals in a day because there was not enough food                                                                               |                         |        |           |       |
| 7. There ever no food to eat of any kind in your household because of lack of resources to get food                                         |                         |        |           |       |
| 8. Any household member go to sleep at night hungry because there was not enough food                                                       |                         |        |           |       |

|                                                                                                            |  |  |  |  |
|------------------------------------------------------------------------------------------------------------|--|--|--|--|
| 9. Any household member go a whole day and night without eating anything because there was not enough food |  |  |  |  |
|------------------------------------------------------------------------------------------------------------|--|--|--|--|

10=No, 1 = Rarely (once or twice in the past four weeks), 2 = Sometimes (three to ten times in the past four weeks), 3 = Often (more than ten times in the past four weeks)

### HFIA category

- 1 = Food Secure
- 2=Mildly Food Insecure Access
- 3=Moderately Food Insecure Access
- 4=Severely Food Insecure Access
- HFIA category = 1 if [(Q1a=0 or Q1a=1) and Q2-Q9=0]
- HFIA category = 2 if [(Q1a=2 or Q1a=3 or Q2a=1 or Q2a=2 or Q2a=3 or Q3a=1 or Q4a=1) and Q5-Q9=0]
- HFIA category = 3 if [(Q3a=2 or Q3a=3 or Q4a=2 or Q4a=3 or Q5a=1 or Q5a=2 or Q6a=1 or Q6a=2) and Q7-Q9=0]
- HFIA category = 4 if [Q5a=3 or Q6a=3 or Q7a=1 or Q7a=2 or Q7a=3 or Q8a=1 or Q8a=2 or Q8a=3 or Q9a=1 or Q9a=2 or Q9a=3]
